# Supplementary material for: Hot-Air Drying Significantly Improves the Quality and Functional Activity of Orange Black Tea Compared with Traditional Sunlight Drying
Source: MDPI journal article supplement (doi:10.3390/foods12091913), 2023-05-07
Supplement: s1 [file s1]

# Supplementary Materials:

**Table S1 Criteria for sensory evaluation of orange black tea**

| Item                    | Factor             | Quality characteristics                                        |
|-------------------------|--------------------|----------------------------------------------------------------|
| Appearance<br>10 points | Color and evenness | smooth; even color                                             |
|                         |                    | Still bright and smooth; still uniform                         |
|                         |                    | Slightly dark , with spots                                     |
|                         |                    | Dark color; localized brown spots                              |
| Soup color<br>10 points | Color              | Red, orange-red, bright                                        |
|                         |                    | Orange-red, still bright                                       |
|                         |                    | orange-red dim                                                 |
|                         |                    | Light orange red, dim                                          |
| Aroma<br>30 points      | Aroma              | Fruity and pleasant aroma                                      |
|                         |                    | Fruity and still pleasant                                      |
|                         |                    | Weak fruity aroma                                              |
|                         |                    | Unpleasant aroma                                               |
|                         | Coordination       | Good coordination, both tea and fruity aromas are evident      |
|                         |                    | Coordination, tea or fruity aroma                              |
|                         |                    | Less coordinated.                                              |
|                         |                    | Incongruous, strange aroma                                     |
| Taste<br>50 points      | Sour               | Not sour                                                       |
|                         |                    | Slightly sour                                                  |
|                         |                    | Relatively sour                                                |
|                         |                    | Sour                                                           |
|                         | Sweet              | Sweet and mellow                                               |
|                         |                    | Relatively sweet                                               |
|                         |                    | Slightly sweet                                                 |
|                         |                    | Not sweet                                                      |
|                         | Bitter             | Not bitter                                                     |
|                         |                    | Slightly bitter                                                |
|                         |                    | Bit bitter                                                     |
|                         |                    | Bitter                                                         |
|                         | Astringency        | Not astringent                                                 |
|                         |                    | Slightly astringent                                            |
|                         |                    | Bit astringent                                                 |
|                         |                    | Astringent                                                     |
|                         | Coordination       | Good coordination of tea and orange flavors                    |
|                         |                    | Coordination, the tea taste is obvious,                        |
|                         |                    | Less coordinated, the orange taste is obvious                  |
|                         |                    | Incongruous, with obvious orange flavor and strong irritation. |

Table S2 Sensory evaluation results of orange black tea with different drying methods

| Treatment      | Appearance                  | Soup color        | Aroma                      |                       | Taste         |         |                 |                     |                    |
|----------------|-----------------------------|-------------------|----------------------------|-----------------------|---------------|---------|-----------------|---------------------|--------------------|
|                |                             |                   | Comment                    | Aroma coordination    | Acid          | Sweet   | Bitter          | Astringent          | Taste coordination |
| Hot air drying | Yellow green , still glossy | Red, still bright | Obvious orange fragrance   | Moderate coordination | Slightly sour | Sweeter | Slightly bitter | Not astringent      | Moderate mellow    |
| Sun drying     | Orange yellow, still glossy | Red and bright    | Strong medicinal fragrance | More coordinated      | Slightly sour | Sweeter | Slightly bitter | Slightly astringent | Slightly bitter    |

Table S3 Effects of drying methods on volatile components of orange black tea (µg/g)

| RT    | RI   | Compound Name                 | Hot air drying      | Sun drying          |
|-------|------|-------------------------------|---------------------|---------------------|
| 5.59  | 937  | $\alpha$ -Pinene              | 26.1 $\pm$ 0.32     | 25.7 $\pm$ 2.52     |
| 6.03  | 963  | Benzaldehyde                  | 2.08 $\pm$ 0.25     | 0.98 $\pm$ 0.13     |
| 6.46  | 975  | Sabinene                      | 36.28 $\pm$ 4.77    | 31.55 $\pm$ 4.68    |
| 6.83  | 989  | $\beta$ -myrcene              | 73.82 $\pm$ 4.98    | 63.19 $\pm$ 8.85    |
| 7.2   | 1004 | octanal                       | 61.88 $\pm$ 4.6     | 117.39 $\pm$ 12.15  |
| 8.03  | 1037 | limonene                      | 1168.18 $\pm$ 122.8 | 1120.91 $\pm$ 15.58 |
| 8.41  | 1045 | Phenylacetaldehyde            | 13.23 $\pm$ 1.57    | 3.51 $\pm$ 0.18     |
| 8.48  | 1295 | perillyl alcohol              | 5.21 $\pm$ 0.6      | 8.76 $\pm$ 0.84     |
| 8.5   | 1047 | $\alpha$ -Ocimene             | 0.82 $\pm$ 0.11     | 3.41 $\pm$ 0.15     |
| 8.9   | 1059 | $\gamma$ -Terpinene           | 6.72 $\pm$ 0.34     | 7.57 $\pm$ 0.36     |
| 9.28  | 1071 | 1-Octanol                     | 24.55 $\pm$ 1.94    | 23.51 $\pm$ 1.82    |
| 9.86  | 1087 | (E)-linalool oxide (furanoid) | 23.99 $\pm$ 2.99    | 32.57 $\pm$ 4.1     |
| 10.37 | 1104 | Linalool                      | 218.58 $\pm$ 13.21  | 123.22 $\pm$ 10.46  |
| 10.61 | 1106 | Nonanal                       | 23.68 $\pm$ 1.36    | 59.6 $\pm$ 5.11     |
| 10.87 | 1113 | Phenylethyl alcohol           | 18.73 $\pm$ 1.24    | 52.41 $\pm$ 6.03    |
| 11.28 | 1123 | (E)-para-2,8-1-menthadienol   | 37.32 $\pm$ 4.33    | 24.2 $\pm$ 2.23     |
| 11.96 | 1138 | (E)-verbenol                  | 43.62 $\pm$ 5.07    | 50.87 $\pm$ 6.45    |
| 12.26 | 1145 | isopulegol                    | 3.08 $\pm$ 0.07     | 7.11 $\pm$ 0.31     |
| 12.52 | 1150 | Camphor                       | -                   | 2.77 $\pm$ 0.12     |
| 12.72 | 1154 | Citronellal                   | 8.48 $\pm$ 0.47     | 17.81 $\pm$ 0.75    |
| 13.6  | 1171 | (E)-linalool oxide (pyranoid) | 3.25 $\pm$ 0.05     | 4.35 $\pm$ 0.08     |
| 13.86 | 1176 | linalool oxide (pyranoid)     | 37.92 $\pm$ 2.31    | 35.29 $\pm$ 4.13    |
| 14.45 | 1188 | isocarveol                    | 12.3 $\pm$ 1.11     | 12.12 $\pm$ 1.62    |
| 14.57 | 1190 | Methyl salicylate             | 54.53 $\pm$ 6.85    | 55.09 $\pm$ 1.22    |
| 14.81 | 1195 | (-)- $\alpha$ -Terpineol      | 77.34 $\pm$ 7.53    | 69.16 $\pm$ 6.28    |
| 15.05 | 1198 | (-)-trans-Isopiperitenol      | 35.11 $\pm$ 2.52    | 36.88 $\pm$ 2.39    |
| 15.38 | 1206 | Decanal                       | 96.91 $\pm$ 7.38    | 91.66 $\pm$ 8.9     |
| 15.63 | 1210 | Octyl acetate                 | 4.24 $\pm$ 0.5      | 4.33 $\pm$ 0.29     |
| 15.92 | 1217 | (E)-carveol                   | 23.2 $\pm$ 1.73     | 25.72 $\pm$ 2.05    |
| 16.04 | 1224 | Nerol                         | 31.39 $\pm$ 4.39    | 30.58 $\pm$ 4.01    |
| 16.35 | 1228 | cis-Carveol                   | 61.7 $\pm$ 6.51     | 65.99 $\pm$ 0.64    |

|       |      |                                  |              |            |
|-------|------|----------------------------------|--------------|------------|
|       |      | Bicyclo[3.1.1]hept-3-en-2-       |              |            |
| 16.65 | 1229 | one,4,6,6-trimethyl-, (1R,5R)-   | 10.29±1.2    | 8.48±0.34  |
| 17.03 | 1237 | (Z)-citral                       | 67.63±8.16   | 67.05±4.45 |
| 17.4  | 1241 | D-carvone                        | 37.33±4.48   | 40.59±1.45 |
| 17.89 | 1253 | Geraniol                         | 52.94±6.97   | 30.15±4.11 |
| 18.57 | 1264 | 2-Methyldodecane                 | 2.23±0.12    | 2.84±0.22  |
| 18.8  | 1268 | citral                           | 108.45±11.43 | 53.7±2.42  |
| 19.19 | 1274 | dl-Perillaldehyde                | 41.12±3.68   | 68.85±4.85 |
|       |      | 2-(4-methylidenecyclohexyl)prop- |              |            |
| 20.04 | 1288 | 2-en-1-ol                        | 19.8±1.19    | 31.17±2.3  |
| 21.11 | 1306 | Undecanal                        | 17.52±1.07   | 24.81±3.28 |
|       |      | 2,6,10,10-Tetramethyl-1-         |              |            |
| 21.25 | 1309 | oxaspiro[4.5]dec-6-ene           | 0.97±0.14    | 3.41±0.08  |
| 21.56 | 1315 | 2,4-Decadienal                   | 1.98±0.24    | 5.99±0.36  |
| 21.78 | 1320 | (E)-methyl geranate              | 14.69±0.57   | 10.33±0.55 |
| 22.96 | 1344 | α-Cubebene                       | 21.31±2.71   | 36.94±2.12 |
| 23.29 | 1350 | citronellol acetate              | 11.61±0.49   | 22.88±1.16 |
| 23.73 | 1358 | Neryl acetate                    | 11.7±1.52    | 11.51±1.1  |
|       |      | 2-(2-Butoxyethoxy)ethyl          |              |            |
| 23.97 | 1362 | acetate                          | 2.48±0.37    | 6.55±0.17  |
| 24.16 | 1366 | Decanoic acid                    | 2.1±0.05     | 3.23±0.42  |
| 24.36 | 1370 | α-Copaene                        | 30.32±3.44   | 30.07±1.79 |
| 24.75 | 1377 | acetic acid geranyl ester        | 23.17±2.68   | 19.5±1.49  |
| 24.84 | 1379 | (3Z)-3-Hexen-1-yl hexanoate      | 4.29±0.36    | 2.89±0.28  |
| 25    | 1381 | β-cubebene                       | 11.78±1.16   | 13.87±1.11 |
| 25.09 | 1383 | β-elemene                        | 13.35±0.99   | 13.86±0.5  |
| 25.22 | 1385 | cis-Jasmone                      | 4.04±0.55    | 4.11±0.47  |
| 26.13 | 1401 | perillyl acetate                 | 3.41±0.48    | 4.24±0.29  |
| 26.24 | 1404 | Lauryl aldehyde                  | 42.38±5.82   | 47.07±6.6  |
| 26.41 | 1407 | isocaryophyllene                 | 13.26±1.45   | 7.97±1.03  |
| 26.62 | 1412 | α-ionone                         | 0.78±0.12    | 0.97±0.12  |
| 26.92 | 1418 | β-copaene                        | 12.5±0.85    | 12.57±0.95 |
| 27.28 | 1418 | cedrene                          | 3.18±0.38    | 1.91±0.22  |
| 27.59 | 1431 | dihydro-beta-ionol               | 0.86±0.04    | 1.17±0.17  |
| 27.83 | 1438 | neryl acetone                    | 1.77±0.14    | 1.88±0.14  |
| 28.1  | 1441 | α-Caryophyllene                  | 7.43±0.53    | 5.48±0.55  |
| 28.27 | 1444 | cis-β-Farnesene                  | 16.93±2.17   | 11.94±0.83 |
| 29.04 | 1459 | α-elemene                        | 2.89±0.15    | 2.58±0.34  |
| 29.21 | 1462 | alloaromadendrene                | 6.55±0.96    | 3.72±0.21  |
| 29.45 | 1467 | β-ionone                         | 20.51±2.56   | 11.35±1.25 |
| 29.89 | 1475 | α-selinene                       | 3.82±0.48    | 2.25±0.26  |
| 30.01 | 1477 | γ-murolene                       | 2.75±0.33    | 1.84±0.26  |
| 30.23 | 1481 | (-)-β-chamigrene                 | 11.54±1.33   | 6.38±0.5   |

|       |      |                           |                  |                  |
|-------|------|---------------------------|------------------|------------------|
| 30.48 | 1486 | $\alpha$ -amorphene       | 6.97 $\pm$ 0.98  | 6.16 $\pm$ 0.28  |
| 31.03 | 1495 | farnesene                 | 23.42 $\pm$ 3.29 | 16.1 $\pm$ 1.26  |
| 31.29 | 1500 | cubebol                   | 1.07 $\pm$ 0.15  | 1.34 $\pm$ 0.02  |
| 31.5  | 1505 | (+)- $\Delta$ -cadinene   | 43.33 $\pm$ 5.99 | 32.54 $\pm$ 2.52 |
| 31.63 | 1507 | calamenene                | 2.63 $\pm$ 0.29  | 4.16 $\pm$ 0.08  |
| 31.85 | 1513 | $\beta$ -Bisabolene       | 2.48 $\pm$ 0.34  | 2.06 $\pm$ 0.14  |
| 32.15 | 1519 | Cubenene                  | 4.91 $\pm$ 0.56  | 5.06 $\pm$ 0.19  |
| 32.53 | 1527 | $\alpha$ -calacorene      | 1.99 $\pm$ 0.26  | 5.16 $\pm$ 0.42  |
| 32.96 | 1537 | $\alpha$ -elemol          | 17.39 $\pm$ 2.18 | 5.25 $\pm$ 0.5   |
| 33.74 | 1554 | Nerolidol                 | 7.14 $\pm$ 1.05  | 6.48 $\pm$ 0.58  |
| 34.18 | 1562 | Spathulenol               | 1 $\pm$ 0.15     | 7.02 $\pm$ 0.8   |
| 34.36 | 1566 | Nerolidol                 | 2.53 $\pm$ 0.36  | 3.91 $\pm$ 0.23  |
| 34.75 | 1574 | Globulol                  | 1.82 $\pm$ 0.23  | 1.87 $\pm$ 0.12  |
| 35.42 | 1590 | cedrol                    | 1.21 $\pm$ 0.1   | 1.78 $\pm$ 0.17  |
| 35.71 | 1593 | Hexadecane                | 0.25 $\pm$ 0.03  | -                |
| 36.45 | 1615 | 1-epi-cubenol             | 6.2 $\pm$ 0.8    | 10.03 $\pm$ 1.35 |
| 36.61 | 1620 | $\gamma$ -eudesmol        | 2.98 $\pm$ 0.21  | -                |
| 36.99 | 1636 | T-muurolol                | 1.93 $\pm$ 0.26  | 2.49 $\pm$ 0.3   |
| 37.06 | 1638 | T-cadinol                 | 2.21 $\pm$ 0.29  | 5.21 $\pm$ 0.25  |
| 37.36 | 1646 | (+/-)-agarospirol         | 8.99 $\pm$ 1.01  | 7.98 $\pm$ 0.98  |
| 37.7  | 1658 | patchouli alcohol         | 2.11 $\pm$ 0.3   | 2.36 $\pm$ 0.33  |
| 37.98 | 1667 | (-)-methyl jasmonate      | 0.55 $\pm$ 0.05  | -                |
| 38.18 | 1674 | Heptanal, 2-benzylidene-  |                  | 3.71 $\pm$ 0.53  |
| 38.5  | 1685 | $\beta$ -sinensal         | 23.79 $\pm$ 2.75 | 15.26 $\pm$ 1.67 |
| 39.69 | 1741 | $\alpha$ -sinensal        | 24.67 $\pm$ 2.77 | 13.38 $\pm$ 1.56 |
| 39.92 | 1754 | (Z)-hexadec-9-enal        | 8.02 $\pm$ 0.9   | 1.88 $\pm$ 0.1   |
| 40.91 | 1811 | 1-hexadecanal             | 0.6 $\pm$ 0.06   | 0.92 $\pm$ 0.11  |
| 41.11 | 1825 | farnesoic acid            | 2.41 $\pm$ 0.21  | 1.74 $\pm$ 0.13  |
| 41.27 | 1837 | Hexahydrofarnesyl acetone | 0.64 $\pm$ 0.06  | 5.5 $\pm$ 0.66   |
| 41.51 | 1855 | CIS-11-HEXADECENAL        | 1.98 $\pm$ 0.25  | 0.96 $\pm$ 0.04  |
| 42.42 | 1921 | Methyl palmitate          | 0.22 $\pm$ 0.03  | 1.64 $\pm$ 0.23  |
| 42.83 | 1956 | Palmitic acid             | 0.62 $\pm$ 0.09  | 0.81 $\pm$ 0.08  |
| 44.54 | 2105 | Phytol                    | 1.47 $\pm$ 0.17  | 2.13 $\pm$ 0.31  |
| total |      |                           | 3103.465         | 3019.193         |

**Table S4 Sensory evaluation results of Orange Black tea with different drying temperatures**

| Treatment | Appearance                       | Soup color        | Aroma                    |                       | Taste         |         |            |                |                    |
|-----------|----------------------------------|-------------------|--------------------------|-----------------------|---------------|---------|------------|----------------|--------------------|
|           |                                  |                   | Comment                  | Aroma coordination    | Acid          | Sweet   | Bitter     | Astringent     | Taste coordination |
| 40°C      | Green yellow brown, still glossy | Red, still bright | Obvious orange fragrance | Moderate coordination | Slightly sour | Sweeter | Not bitter | Not astringent | Moderate mellow    |

|      |                                  |                         |                                |                     |                  |         |                    |                        |                    |
|------|----------------------------------|-------------------------|--------------------------------|---------------------|------------------|---------|--------------------|------------------------|--------------------|
| 45°C | Green<br>brown, still<br>glossy  | Red<br>and<br>bright    | Obvious<br>orange<br>fragrance | More<br>coordinated | Slightly<br>sour | Sweeter | Slightly<br>bitter | Not<br>astringent      | Moderate<br>mellow |
| 50°C | Green<br>brown, still<br>glossy  | Red,<br>still<br>bright | Obvious<br>orange<br>fragrance | More<br>coordinated | Slightly<br>sour | Sweeter | Slightly<br>bitter | Slightly<br>astringent | Moderate<br>mellow |
| 60°C | Yellow<br>brown, still<br>glossy | Red,<br>still<br>bright | Obvious<br>tea<br>fragrance    | More<br>coordinated | Slightly<br>sour | Sweeter | Slightly<br>bitter | Slightly<br>astringent | Slightly<br>bitter |
